# Supplementary material for: Polarized SERS Controlled by Anisotropic Growth on Ordered Curvature Substrate
Source: MDPI journal article supplement (doi:10.3390/molecules26082338), 2021-04-17
Supplement: s1 [file s1]

# **Polarized SERS Controlled by Anisotropic Growth on Ordered Curved Substrate**

Y.X. Wang<sup>1,2</sup>, A.N. Zhu<sup>3</sup>, X.L. Zhang<sup>4\*</sup>, Y.J. Zhang<sup>1,2\*</sup>

<sup>1</sup>School of Material and Environmental Engineering, Hangzhou Dianzi University, Hangzhou 310018, P.R. China.

<sup>2</sup>Research Center for Advanced Optoelectronics, School of Material and Environmental Engineering, Hangzhou Dianzi University, Hangzhou 310018, P.R. China

<sup>3</sup> College of Chemistry, Nankai University, Tianjin 300071, P.R. China.

<sup>4</sup> College of Physics, Jilin Normal University, Changchun 130103, PR China

\* Correspondence: yjzhang@hdu.edu.cn

Deposition angle means the angle between the normal direction of the substrate and the vertical direction.

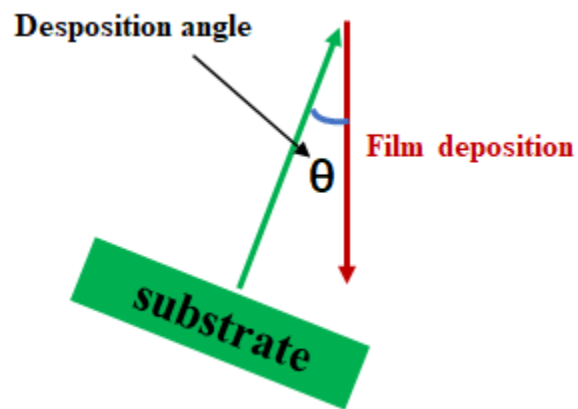

**Figure S1**

The yellow line and the green line show two different directions of the film depositions, chosen in our work.

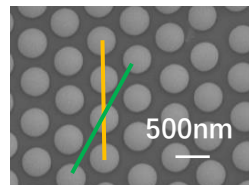

**Figure S2**

When the deposition angle  $\theta$  is 70 degrees and the deposition direction is along the green line, the cone-shaped nanostructures form on the ordered PS500nm array etched 3.5min.

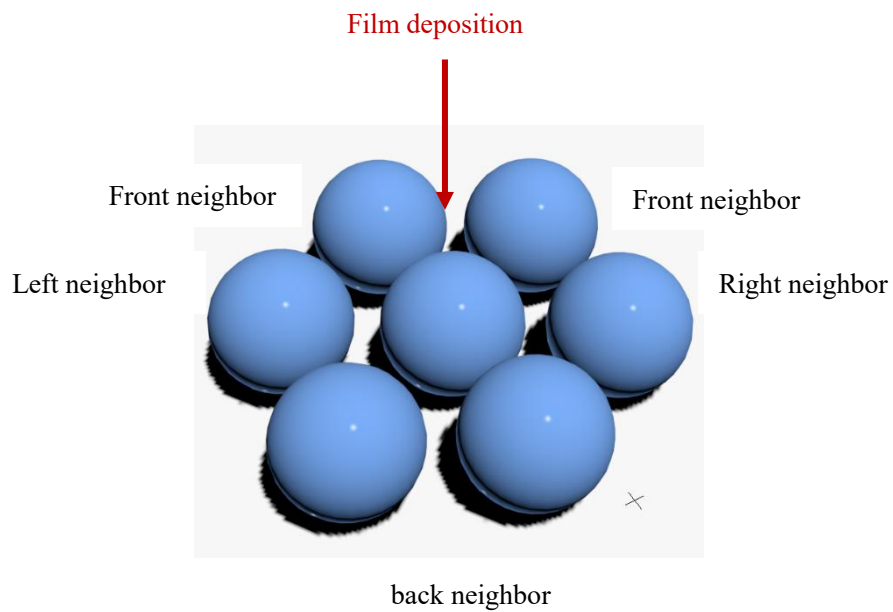

**Figure S3**

Due to the shadow effects from the neighbors and self-effect, the film depositions onto each PS bead show different growth mechanisms. When 70 degrees deposition is performed, the square-shaped unit is obtained.

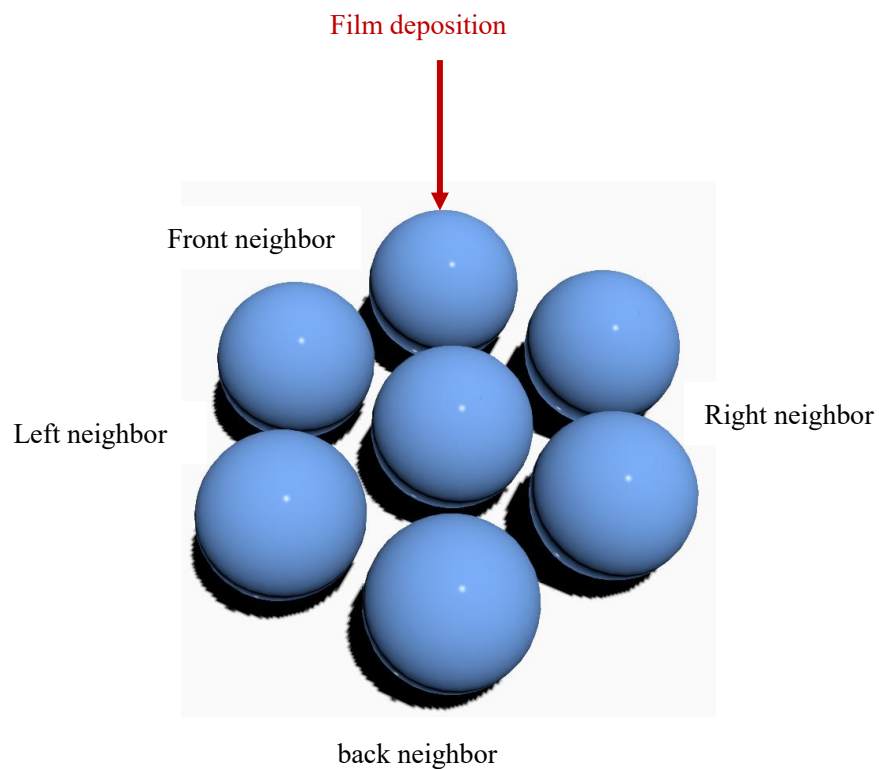

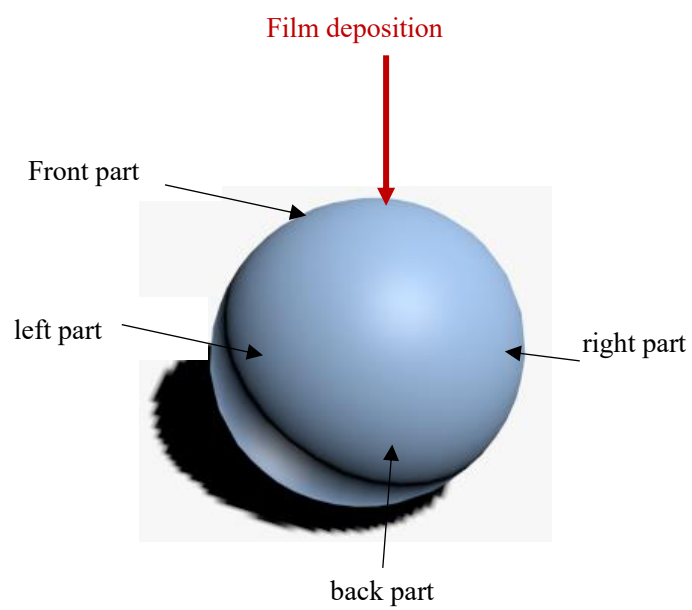

**Figure S4**

P polarization means the E vector of exciting light is along the red line. S polarization means the E vector of exciting light is along the green line.

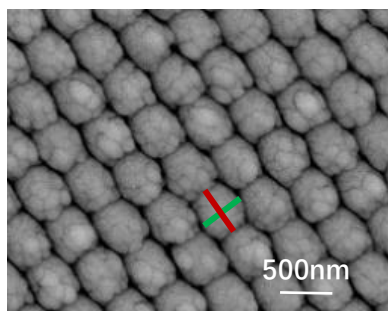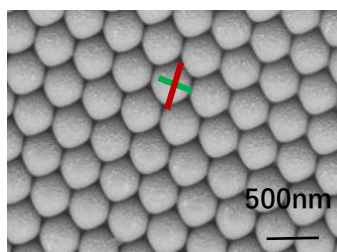

**Figure S5**

FDTD simulations show the square-shaped show better SERS properties compared to the cone-shaped. And the improved SERS properties are from the narrow gaps and more hotspots when excited by p polarized light. Long time deposition decreases the gaps between the neighbors, leading to the stronger coupling.

**Square shape 10min**

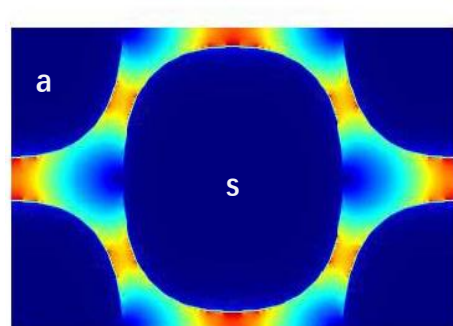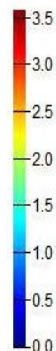

**15min**

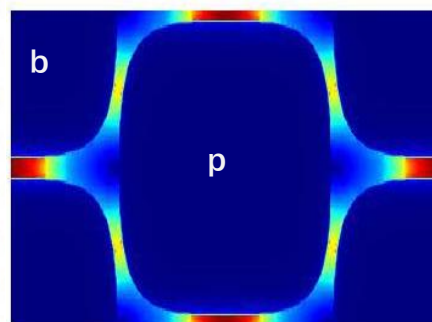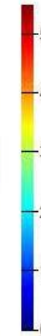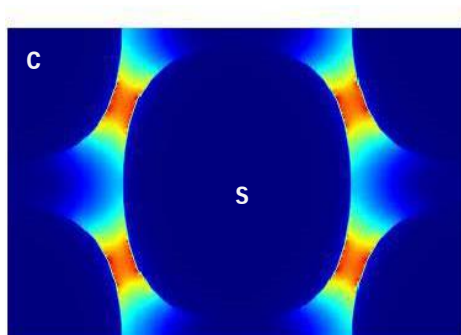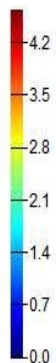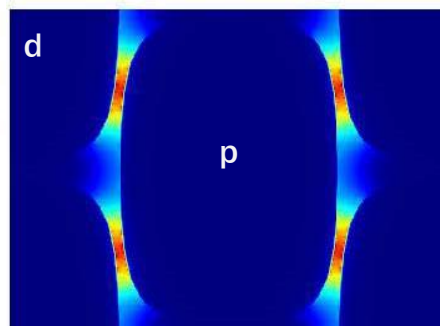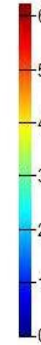

**Cone shape**

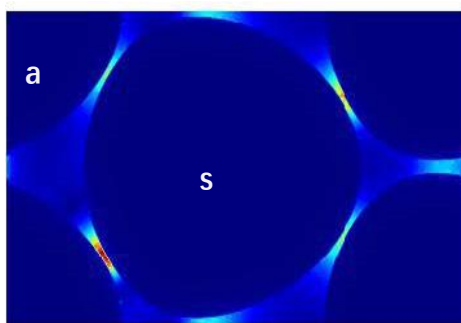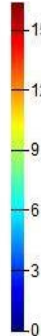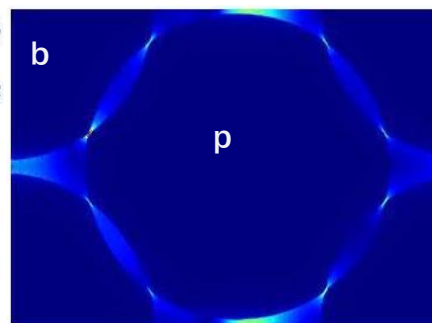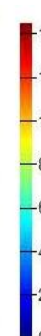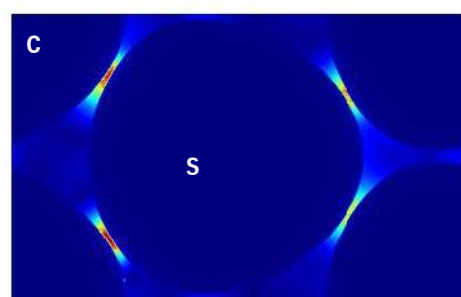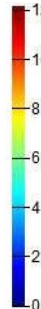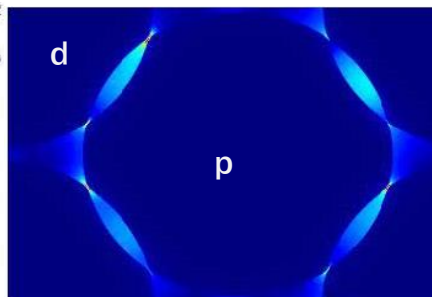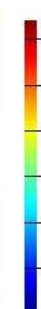

**Figure S6**
